# Supplementary material
Source: MDPI journal article supplement (https://www.mdpi.com/2073-4352/10/9/784)
Supplement: s1 [file s1]

# Supporting Information

## Efficient Broadband Truncated-Pyramid-Based Metamaterial Absorber in the Visible and Near-Infrared Regions

Phuc Toan Dang <sup>1</sup>, Tuan V. Vu <sup>2,3</sup>, Jongyoon Kim <sup>1</sup>, Jimin Park <sup>1</sup>, Van-Chuc Nguyen <sup>1</sup>, Dat D. Vo <sup>2,3</sup>,  
Truong Khang Nguyen <sup>2,3</sup>, Khai Q. Le <sup>2,3,\*</sup> and Ji-Hoon Lee <sup>1,\*</sup>

<sup>1</sup> Future Semiconductor Convergence Technology Research Center, Division of Electronics Engineering, Jeonbuk National University, Jeonju 54896, Korea

<sup>2</sup> Division of Computational Physics, Institute for Computational Science, Ton Duc Thang University, Ho Chi Minh City 700000, Vietnam

<sup>3</sup> Faculty of Electrical & Electronics Engineering, Ton Duc Thang University, Ho Chi Minh City 700000, Vietnam

\* Correspondence: lequangkhai@tdtu.edu.vn (K.Q.L.); jihoonlee@jbnu.ac.kr (J.-H.L.)

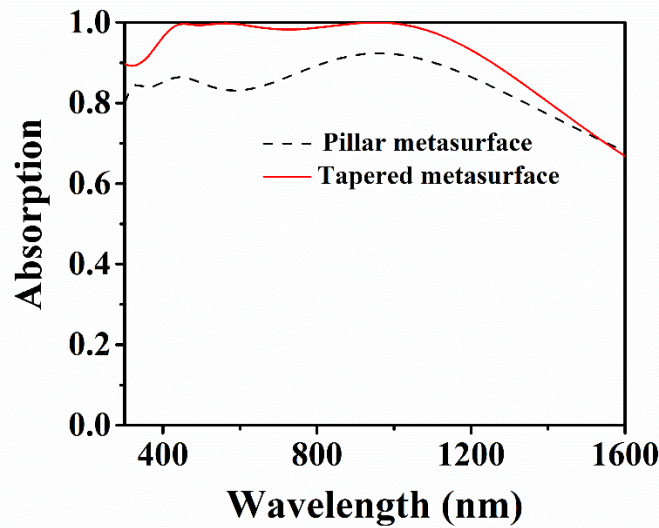

**Figure S1.** The absorption performances of pillars (cylinder) and truncated pyramids with normally incident TE-polarized light. The height and radius of pillar are 140 and 70 nm, respectively.
